# Supplementary material
Source: PubMed Central journal article supplement (PMC7981246)
Supplement: NIHMS1640390-supplement-sup-0001-FigS1.pdf [file NIHMS1640390-supplement-sup-0001-FigS1.pdf]

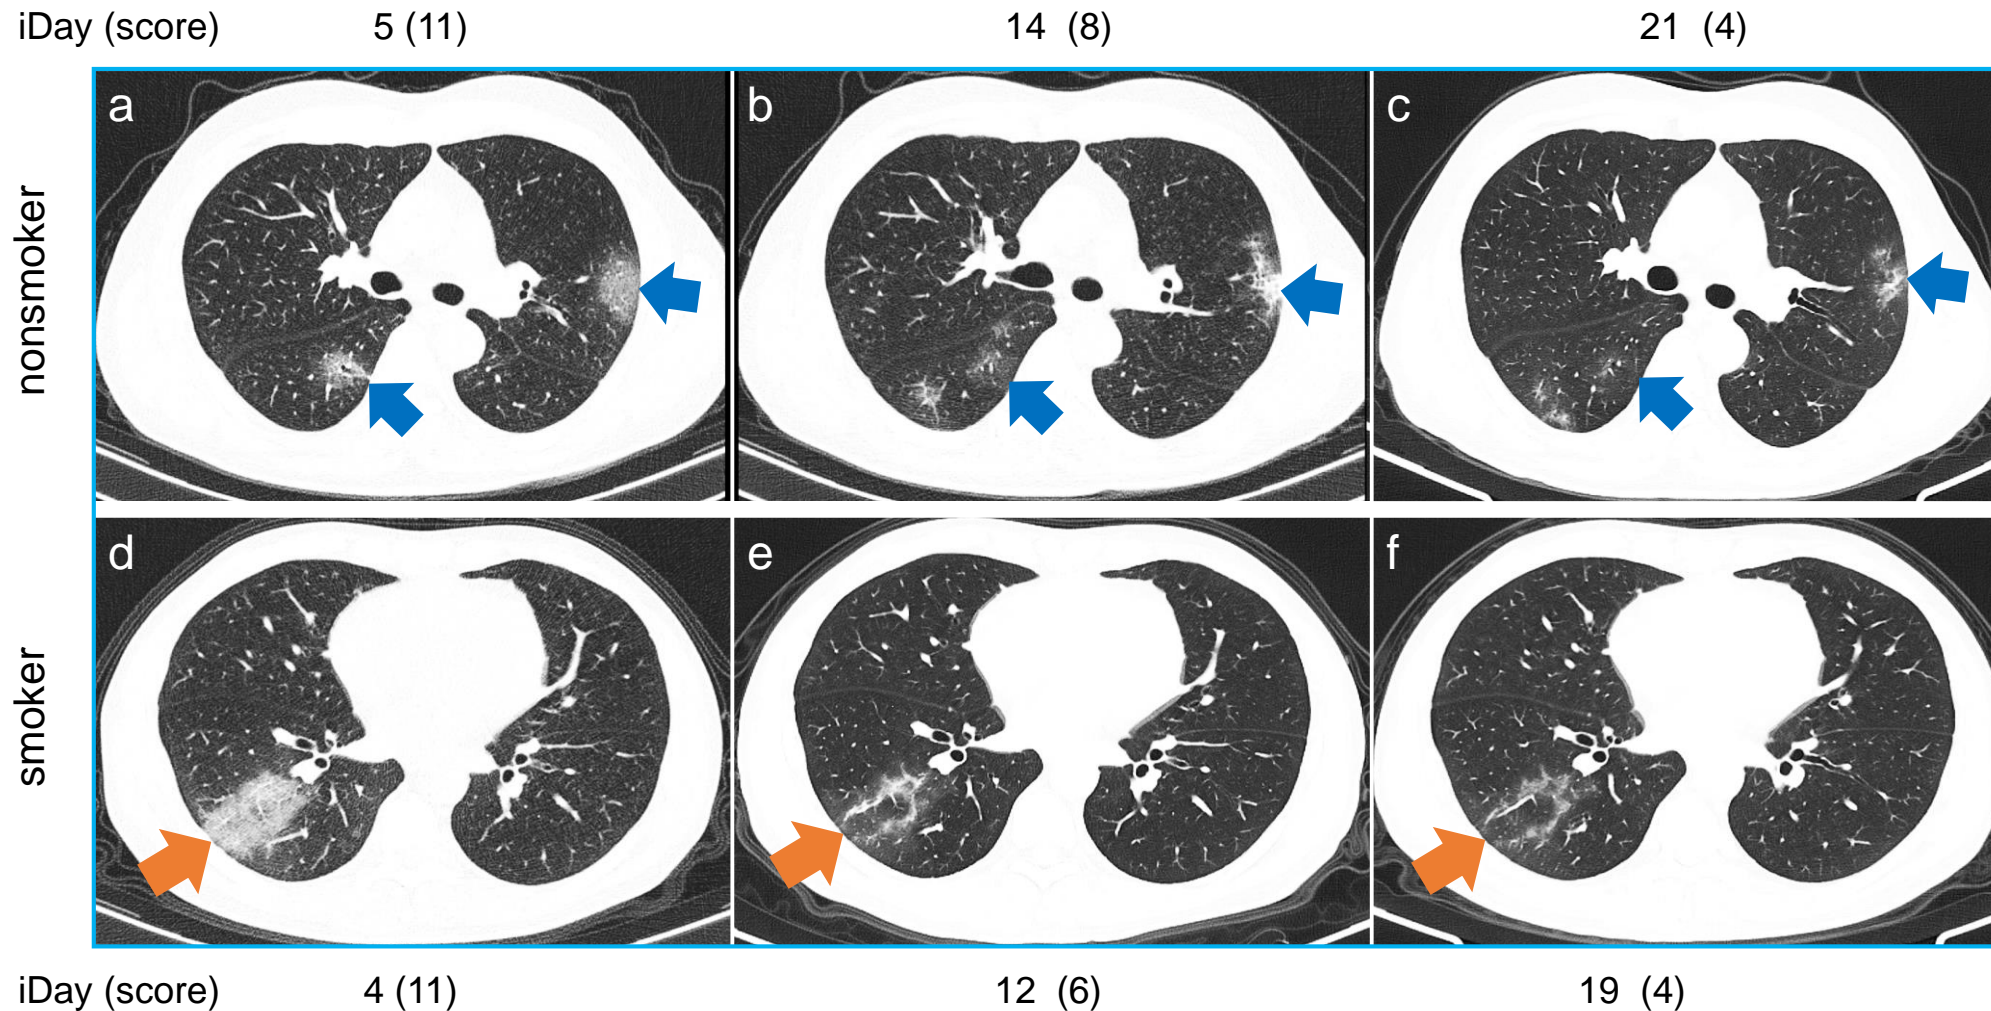

**Figure S1. CT images: similar recovery ability of COVID-19 lungs between a representative nonsmoker and a representative smoker.**

*Top*, a 44-year-old male nonsmoker patient (marked in Figure 4d) scanned on illness days (iDays) 5, 14, and 21 (score in parenthesis).

(a) Small spatchy ground-glass opacities (GGO, blue arrow) in bilateral lower lobes of right lung, especial subpleural area, without pleural effusion. (b) Improvement of GGO. The left lung lesion showed a higher density, with air bronchogram sign and thickened pleura. (c) Further absorption of the lung lesion.

*Bottom*, a 44-year-old male smoker patient, on iDays 4, 12 and 19 (marked in Figure 4e). (d) Spatchy ground-glass opacities (GGO, brown arrow) in the lower lobe of right lung without adjacent pleura thickened and pleural effusion. (e) Improvement of GGO with some fiber strips. (f) Further absorption of the lung lesion.
